# Supplementary material
Source: Frontiers journal article supplement (https://www.frontiersin.org/articles/312638)
Supplement: Table_7.XLS [file Table_7.XLS]

## Sheet: Counts-09
Supplemental Table 7 - number of significant stoichiometric correlation at the threshold of 0.9 - comparison between the number of significant stoichiometric correlation at the threshold of 0.9 for T. durum, T. dicoccoides and T. dioccum
	Pairs	Triplets	Quadruples
T. durum	0	1	36
T. dicoccoides	1	84	714
T. dicoccum	2	101	748
Shared between T. durum and T. dicoccoides	0	0	3
Shared between T. durum and T. dicoccum	0	0	3
Shared between T. dicoccum and T. dicoccoides	1	23	169
Shared between all	0	0	1

## Sheet: pair_Durum_Dicoccoides-09
Supplemental Table 7 - Common significantly correlated metabolite pairs between T. durum and T. dicoccoides using SCA at the threshold of 0.9.
metabolite pairs
0

## Sheet: pair_Durum_Dicoccum-09
Supplemental Table 7 - Common significantly correlated metabolite pairs between T. durum and T. dicoccum using SCA at the threshold of 0.9.
metabolite pairs
0

## Sheet: pair_Dicoccum_Dicoccoides-09
Supplemental Table 7 - Common significantly correlated metabolite pairs between T. dicoccum and T. dicoccoides using SCA at the threshold of 0.9.
metabolite pairs
SERINE->THREONINE

## Sheet: pair_all-09
Supplemental Table 7 - Common significantly correlated metabolite pairs between T. durum, T. dicoccum and T. dicoccoides using SCA at the threshold of 0.9.
metabolite pairs
0

## Sheet: triplets_Durum_Dicoccoides-09
Supplemental Table 7 - Common significantly correlated metabolite triplets between T. durum and T. dicoccoides using SCA at the threshold of 0.9.
metabolite triples
0

## Sheet: triplets_Durum_Dicoccum-09
Supplemental Table 7 - Common significantly correlated metabolite triplets between T. durum and T. dicoccum using SCA at the threshold of 0.9.
metabolite triples
0

## Sheet: triplets_Dicoccum_Dicoccoides-0
Supplemental Table 7 - Common significantly correlated metabolite triplets between T. dicoccum and T. dicoccoides using SCA at the threshold of 0.9.
metabolite triples
GLYCINE+SERINE->THREONINE
LEUCINE+SERINE->THREONINE
LEUCINE+THREONINE->SERINE
PROLINE+THREONINE->SERINE
ARABINOSE+SERINE->THREONINE
ASPARAGINE+SERINE->GLUTAMIC.ACID
ASPARAGINE+SERINE->THREONINE
ASPARTIC.ACID+SERINE->THREONINE
CITRIC.ACID+SERINE->THREONINE
GLUTAMIC.ACID+SERINE->THREONINE
MYO.INOSITOL+SERINE->THREONINE
SERINE+SUCROSE->THREONINE
ARABINOSE+THREONINE->SERINE
ASPARAGINE+THREONINE->GLUTAMIC.ACID
ASPARTIC.ACID+THREONINE->SERINE
FRUCTOSE+THREONINE->SERINE
GLUCONIC.ACID+THREONINE->SERINE
GLUCOSE+THREONINE->SERINE
MALTOSE+THREONINE->SERINE
MYO.INOSITOL+THREONINE->SERINE
THREONINE+g.AMINOBUTIRIC.ACID->SERINE
SERINE+VALINE->THREONINE
THREONINE+VALINE->SERINE

## Sheet: triplets_all-09
Supplemental Table 7 - Common significantly correlated metabolite triplets between T. durum, T. dicoccum and T. dicoccoides using SCA at the threshold of 0.9.
metabolite triples
0

## Sheet: quadruples_Durum_Dicoccoides-09
Supplemental Table 7 - Common significantly correlated metabolite quadruples between T. durum and T. dicoccoides using SCA at the threshold of 0.9.
metabolite quadruples
ASPARTIC.ACID+GLUCOSE->FRUCTOSE+GLYCINE
ASPARAGINE+CITRIC.ACID->GLUTAMIC.ACID+GLYCINE
GLUCOSE+THREONINE->FRUCTOSE+SERINE

[truncated: 3 more sheets: quadruples_Durum_Dicoccum-09, quadruples_Dicoccum_Dicoccoides, quadruples_all-09]
